# Supplementary material for: Conformational characteristics and conformation-dependent properties of poly(ε-caprolactone)
Source: Royal Society of Chemistry journal article supplement (doi:10.1039/d2cp01273a), 2022-01-01
Supplement: d2cp01273a1.pdf [file d2cp01273a1.pdf]

## Supplementary information

### Conformational characteristics and conformation-dependent properties of poly( $\epsilon$ -caprolactone)

Azumi Kawai, Naoki Hamamoto, and Yuji Sasanuma\*

Department of Applied Chemistry and Biotechnology, Graduate School and Faculty of Engineering, Chiba University, 1-33 Yayoi-cho, Inage-ku, Chiba 263-8522, Japan

#### Appendix A Statistical weight matrices $U_j$ 's ( $j$ , bond number) of PCL

$$U_1 = C_1 \otimes R_1 \quad (\text{A1})$$

$$U_2 = C_1 \otimes R_1 \quad (\text{A2})$$

$$U_3 = C_1 \otimes R_3 \quad (\text{A3})$$

$$U_4 = I_3 \otimes R_3 \quad (\text{A4})$$

$$U_5 = I_9 \otimes R_3 \quad (\text{A5})$$

$$U_6 = I_{27} \otimes R_3 \quad (\text{A6})$$

$$U_7 = I_{81} \otimes R_3 \quad (\text{A7})$$

$$U_8 = \begin{bmatrix} u_{tttt} & u_{tttg^+} & u_{tttg^-} & 0 & 0 & 0 & \cdots \\ 0 & 0 & 0 & u_{tttg^+t} & u_{tttg^+g^+} & u_{tttg^+g^-} & \\ & \vdots & & & \vdots & & \ddots \\ & & & & & & \cdots & u_{g^-g^-g^-g^-g^-t} & u_{g^-g^-g^-g^-g^-g^+} & u_{g^-g^-g^-g^-g^-g^-} \end{bmatrix} \quad (\text{A8})$$

$$U_a = C_3 \otimes I_{81} \otimes R_1 \quad (\text{A9})$$

$$U_b = C_3 \otimes I_{81} \otimes R_3 \quad (\text{A10})$$

$$U_c = U_d = U_e = U_f = U_b \quad (\text{A11})$$

$$U_g = U_8 \quad (\text{A12})$$

$$U_m = U_a \quad (\text{A13})$$

and

$$U_n = U_b \quad (\text{A14})$$

where  $\otimes$  stands for the direct product,

$$C_1 = \begin{pmatrix} 1 \\ 0 \\ 0 \end{pmatrix} \quad (\text{A15})$$

$$C_3 = \begin{pmatrix} 1 \\ 1 \\ 1 \end{pmatrix} \quad (\text{A16})$$

$$R_1 = \begin{pmatrix} 1 & 0 & 0 \end{pmatrix} \quad (\text{A17})$$

$$R_3 = \begin{pmatrix} 1 & 1 & 1 \end{pmatrix} \quad (\text{A18})$$

$I_i$  stands for the identity matrix of size  $i$  ( $i = 3, 9, 27$ , or  $81$ ), and, for example,

$$u_{tttg^+t} = \exp(-\Delta G_{tttg^+t}/RT) \quad (\text{A19})$$

is the statistical weight of the  $tttg^+t$  conformation with  $R$  and  $T$  being the gas constant and absolute temperature, respectively. The size of  $U_8 - U_n$  is  $243 \times 243$ .

## Appendix B Stiffness ( $C$ ) and compliance ( $S$ ) tensors of PES and PBS

(a) Stiffness ( $C$ ) and compliance ( $S$ ) tensors of PES

$$C = \begin{bmatrix} 21.864 & 12.391 & 14.756 & 0.000 & 0.000 & 0.000 \\ & 19.514 & 17.097 & 0.000 & 0.000 & 0.000 \\ & & 64.645 & 0.000 & 0.000 & 0.000 \\ & & & 15.018 & 0.000 & 0.000 \\ & & & & 5.700 & 0.000 \\ & & & & & 17.299 \end{bmatrix} \text{ (GPa)} \quad (\text{B1})$$

$$S = \begin{bmatrix} 73.0488 & -41.3600 & -5.7355 & 0.0000 & 0.0000 & 0.0000 \\ & 90.1182 & -14.3937 & 0.0000 & 0.0000 & 0.0000 \\ & & 20.5852 & 0.0000 & 0.0000 & 0.0000 \\ & & & 66.5860 & 0.0000 & 0.0000 \\ & & & & 175.4493 & 0.0000 \\ & & & & & 57.8069 \end{bmatrix} \text{ (TPa}^{-1}\text{)} \quad (\text{B2})$$

The above  $S$  tensor yields the crystalline moduli in the  $a$ -,  $b$ -, and  $c$ -axis directions as  $E_a = 13.69$ ,  $E_b = 11.10$ , and  $E_c = 48.58$  GPa.

(b) Stiffness and compliance tensors of PBS

$$C = \begin{bmatrix} 26.115 & 11.761 & 29.132 & 0.000 & -11.669 & 0.000 \\ & 22.132 & 13.127 & 0.000 & 0.311 & 0.000 \\ & & 50.815 & 0.000 & -16.395 & 0.000 \\ & & & 10.266 & 0.000 & -0.832 \\ & & & & 7.818 & 0.000 \\ & & & & & 5.915 \end{bmatrix} \text{ (GPa)} \quad (\text{B3})$$

$$S = \begin{bmatrix} 133.2536 & -39.4397 & -53.8006 & 0.0000 & 38.4527 & 0.0000 \\ & 70.1819 & -6.0408 & 0.0000 & -32.6114 & 0.0000 \\ & & 57.9558 & 0.0000 & 18.1985 & 0.0000 \\ & & & 98.5341 & 0.0000 & 13.8623 \\ & & & & 98.6212 & 0.0000 \\ & & & & & 171.0094 \end{bmatrix} \text{ (TPa}^{-1}\text{)} \quad (\text{B4})$$

The above  $S$  tensor yields the crystalline moduli in the  $a$ -,  $b$ -, and  $c$ -axis directions as  $E_a = 7.51$ ,  $E_b = 14.25$ , and  $E_c = 67.24$  GPa.

**Table S1** Gibbs free energies of MAH

| Conformation <sup>a</sup>                                      | $\Delta G_k$ (kcal mol <sup>-1</sup> ) |         |        | Conformation                                                                | $\Delta G_k$ (kcal mol <sup>-1</sup> ) |         |       |
|----------------------------------------------------------------|----------------------------------------|---------|--------|-----------------------------------------------------------------------------|----------------------------------------|---------|-------|
|                                                                | Gas                                    | Benzene | DMSO   |                                                                             | Gas                                    | Benzene | DMSO  |
| ttttt                                                          | 0.000                                  | 0.000   | 0.000  | tg <sup>+</sup> g <sup>+</sup> g <sup>+</sup> g <sup>+</sup> g <sup>+</sup> | 0.366                                  | 0.536   | 0.781 |
| ttttg <sup>+</sup> t                                           | -0.152                                 | -0.005  | 0.175  | tg <sup>+</sup> g <sup>+</sup> g <sup>+</sup> g <sup>-</sup> t              | 1.102                                  | 1.418   | 1.718 |
| ttttg <sup>+</sup> g <sup>+</sup>                              | 0.130                                  | 0.085   | 0.067  | tg <sup>+</sup> g <sup>+</sup> g <sup>+</sup> g <sup>-</sup> g <sup>-</sup> | 1.116                                  | 1.330   | 1.656 |
| tttg <sup>+</sup> tt                                           | 0.550                                  | 0.569   | 0.573  | tg <sup>+</sup> g <sup>+</sup> g <sup>-</sup> tt                            | 1.903                                  | 2.040   | 2.197 |
| tttg <sup>+</sup> g <sup>+</sup> t                             | 0.283                                  | 0.415   | 0.552  | tg <sup>+</sup> g <sup>+</sup> g <sup>-</sup> tg <sup>-</sup>               | 1.972                                  | 2.026   | 2.161 |
| tttg <sup>+</sup> g <sup>+</sup> g <sup>+</sup>                | 0.066                                  | 0.135   | 0.274  | tg <sup>+</sup> g <sup>+</sup> g <sup>-</sup> g <sup>+</sup> t              | 2.206                                  | 2.647   | 3.206 |
| tttg <sup>+</sup> g <sup>+</sup> t                             | 0.692                                  | 0.828   | 0.980  | tg <sup>+</sup> g <sup>+</sup> g <sup>-</sup> g <sup>-</sup> t              | 1.285                                  | 1.536   | 1.807 |
| tttg <sup>+</sup> g <sup>-</sup> g <sup>-</sup>                | 1.304                                  | 1.330   | 1.438  | tg <sup>+</sup> g <sup>+</sup> g <sup>-</sup> g <sup>-</sup> g <sup>+</sup> | 1.692                                  | 2.308   | 2.934 |
| ttg <sup>+</sup> ttt                                           | 0.378                                  | 0.388   | 0.377  | tg <sup>+</sup> g <sup>+</sup> g <sup>-</sup> g <sup>-</sup> g <sup>-</sup> | 1.584                                  | 2.129   | 2.735 |
| ttg <sup>+</sup> tg <sup>+</sup> t                             | 0.590                                  | 0.734   | 0.849  | tg <sup>+</sup> g <sup>-</sup> ttt                                          | 0.727                                  | 0.853   | 0.970 |
| ttg <sup>+</sup> tg <sup>+</sup> g <sup>+</sup>                | 0.893                                  | 0.883   | 0.950  | tg <sup>+</sup> g <sup>-</sup> tg <sup>+</sup> t                            | 0.982                                  | 1.221   | 1.465 |
| ttg <sup>+</sup> tg <sup>+</sup> t                             | 0.599                                  | 0.746   | 0.964  | tg <sup>+</sup> g <sup>-</sup> tg <sup>+</sup> g <sup>+</sup>               | 0.976                                  | 1.032   | 1.126 |
| ttg <sup>+</sup> tg <sup>-</sup> g <sup>-</sup>                | 0.954                                  | 0.938   | 0.994  | tg <sup>+</sup> g <sup>-</sup> tg <sup>-</sup> t                            | 0.514                                  | 0.734   | 0.981 |
| ttg <sup>+</sup> g <sup>+</sup> tt                             | 0.877                                  | 0.889   | 0.854  | tg <sup>+</sup> g <sup>-</sup> tg <sup>-</sup> g <sup>-</sup>               | 0.916                                  | 0.972   | 1.096 |
| ttg <sup>+</sup> g <sup>+</sup> tg <sup>-</sup>                | 1.383                                  | 1.298   | 1.254  | tg <sup>+</sup> g <sup>-</sup> g <sup>+</sup> tg <sup>+</sup>               | 1.959                                  | 2.128   | 2.317 |
| ttg <sup>+</sup> g <sup>+</sup> g <sup>+</sup> t               | 1.060                                  | 1.203   | 1.372  | tg <sup>+</sup> g <sup>-</sup> g <sup>+</sup> tg <sup>-</sup>               | 3.114                                  | 3.626   | 4.219 |
| ttg <sup>+</sup> g <sup>+</sup> g <sup>+</sup> g <sup>+</sup>  | 1.285                                  | 1.354   | 1.485  | tg <sup>+</sup> g <sup>-</sup> g <sup>+</sup> g <sup>+</sup> t              | 2.549                                  | 2.795   | 3.044 |
| ttg <sup>+</sup> g <sup>+</sup> g <sup>+</sup> t               | 1.253                                  | 1.473   | 1.694  | tg <sup>+</sup> g <sup>-</sup> g <sup>+</sup> g <sup>+</sup> g <sup>+</sup> | 2.558                                  | 2.853   | 3.162 |
| ttg <sup>+</sup> g <sup>+</sup> g <sup>-</sup> g <sup>-</sup>  | 1.574                                  | 1.685   | 1.869  | tg <sup>+</sup> g <sup>-</sup> g <sup>-</sup> tt                            | 1.070                                  | 1.540   | 2.071 |
| ttg <sup>+</sup> g <sup>-</sup> tt                             | 2.568                                  | 2.643   | 2.720  | tg <sup>+</sup> g <sup>-</sup> g <sup>-</sup> tg <sup>-</sup>               | 1.081                                  | 1.272   | 1.518 |
| ttg <sup>+</sup> g <sup>-</sup> g <sup>+</sup> t               | 2.528                                  | 3.247   | 4.007  | tg <sup>+</sup> g <sup>-</sup> g <sup>-</sup> g <sup>+</sup> t              | 2.329                                  | 2.821   | 3.390 |
| ttg <sup>+</sup> g <sup>-</sup> g <sup>-</sup> t               | 1.894                                  | 2.132   | 2.427  | tg <sup>+</sup> g <sup>-</sup> g <sup>-</sup> g <sup>+</sup> g <sup>+</sup> | 2.692                                  | 2.968   | 3.250 |
| tg <sup>+</sup> tttt                                           | -0.025                                 | 0.037   | 0.112  | tg <sup>+</sup> g <sup>-</sup> g <sup>-</sup> g <sup>-</sup> t              | 1.122                                  | 1.413   | 1.739 |
| tg <sup>+</sup> ttg <sup>+</sup> t                             | -0.500                                 | -0.303  | -0.044 | tg <sup>+</sup> g <sup>-</sup> g <sup>-</sup> g <sup>-</sup> g <sup>-</sup> | 0.824                                  | 1.098   | 1.434 |
| tg <sup>+</sup> ttg <sup>+</sup> g <sup>+</sup>                | 0.204                                  | 0.218   | 0.290  | g <sup>+</sup> ttttt                                                        | 0.206                                  | 0.327   | 0.465 |
| tg <sup>+</sup> ttg <sup>-</sup> t                             | -0.377                                 | -0.234  | -0.103 | g <sup>+</sup> tttg <sup>+</sup> t                                          | 0.294                                  | 0.502   | 0.655 |
| tg <sup>+</sup> ttg <sup>-</sup> g <sup>-</sup>                | 0.014                                  | 0.012   | 0.061  | g <sup>+</sup> tttg <sup>+</sup> g <sup>+</sup>                             | 0.673                                  | 0.768   | 0.960 |
| tg <sup>+</sup> tg <sup>+</sup> tt                             | 0.253                                  | 0.316   | 0.393  | g <sup>+</sup> tttg <sup>-</sup> t                                          | 0.137                                  | 0.407   | 0.809 |
| tg <sup>+</sup> tg <sup>+</sup> g <sup>+</sup> t               | 0.439                                  | 0.582   | 0.721  | g <sup>+</sup> tttg <sup>-</sup> g <sup>-</sup>                             | 0.516                                  | 0.600   | 0.800 |
| tg <sup>+</sup> tg <sup>+</sup> g <sup>+</sup> g <sup>+</sup>  | 0.161                                  | 0.213   | 0.248  | g <sup>+</sup> ttg <sup>+</sup> tt                                          | 0.574                                  | 0.700   | 0.840 |
| tg <sup>+</sup> tg <sup>+</sup> g <sup>-</sup> t               | 0.207                                  | 0.441   | 0.737  | g <sup>+</sup> ttg <sup>+</sup> g <sup>+</sup> t                            | 0.775                                  | 1.033   | 1.368 |
| tg <sup>+</sup> tg <sup>+</sup> g <sup>-</sup> g <sup>-</sup>  | 1.232                                  | 1.329   | 1.456  | g <sup>+</sup> ttg <sup>+</sup> g <sup>+</sup> g <sup>+</sup>               | 0.872                                  | 1.081   | 1.426 |
| tg <sup>+</sup> tg <sup>-</sup> tt                             | 0.254                                  | 0.317   | 0.359  | g <sup>+</sup> ttg <sup>+</sup> g <sup>-</sup> t                            | 1.362                                  | 1.572   | 1.776 |
| tg <sup>+</sup> tg <sup>-</sup> g <sup>+</sup> t               | 0.707                                  | 0.917   | 1.168  | g <sup>+</sup> ttg <sup>+</sup> g <sup>-</sup> g <sup>-</sup>               | 1.347                                  | 1.502   | 1.765 |
| tg <sup>+</sup> tg <sup>-</sup> g <sup>+</sup> g <sup>+</sup>  | 1.127                                  | 1.263   | 1.487  | g <sup>+</sup> ttg <sup>-</sup> tt                                          | 0.504                                  | 0.646   | 0.852 |
| tg <sup>+</sup> tg <sup>-</sup> g <sup>-</sup> t               | 0.238                                  | 0.398   | 0.561  | g <sup>+</sup> ttg <sup>-</sup> g <sup>+</sup> t                            | 0.983                                  | 1.244   | 1.587 |
| tg <sup>+</sup> tg <sup>-</sup> g <sup>-</sup> g <sup>-</sup>  | 0.222                                  | 0.396   | 0.667  | g <sup>+</sup> ttg <sup>-</sup> g <sup>+</sup> g <sup>+</sup>               | 1.719                                  | 1.795   | 1.830 |
| tg <sup>+</sup> g <sup>+</sup> ttt                             | 0.082                                  | 0.154   | 0.213  | g <sup>+</sup> ttg <sup>-</sup> g <sup>-</sup> t                            | 0.574                                  | 0.839   | 1.148 |
| tg <sup>+</sup> g <sup>+</sup> ttg <sup>+</sup>                | 0.594                                  | 0.587   | 0.645  | g <sup>+</sup> ttg <sup>-</sup> g <sup>-</sup> g <sup>-</sup>               | 0.993                                  | 1.015   | 0.950 |
| tg <sup>+</sup> g <sup>+</sup> g <sup>+</sup> t                | -0.341                                 | -0.107  | 0.091  | g <sup>+</sup> tg <sup>+</sup> ttt                                          | 0.843                                  | 0.952   | 0.969 |
| tg <sup>+</sup> g <sup>+</sup> g <sup>+</sup> g <sup>+</sup>   | 0.585                                  | 0.589   | 0.629  | g <sup>+</sup> tg <sup>+</sup> ttg <sup>-</sup>                             | 1.139                                  | 1.186   | 1.296 |
| tg <sup>+</sup> g <sup>+</sup> g <sup>+</sup> t                | 0.047                                  | 0.261   | 0.544  | g <sup>+</sup> tg <sup>+</sup> tg <sup>+</sup> t                            | 0.299                                  | 0.602   | 1.047 |
| tg <sup>+</sup> g <sup>+</sup> g <sup>-</sup> g <sup>-</sup>   | 0.477                                  | 0.510   | 0.606  | g <sup>+</sup> tg <sup>+</sup> tg <sup>+</sup> g <sup>+</sup>               | 1.026                                  | 1.136   | 1.350 |
| tg <sup>+</sup> g <sup>+</sup> g <sup>+</sup> tt               | 0.783                                  | 0.846   | 0.865  | g <sup>+</sup> tg <sup>+</sup> tg <sup>-</sup> t                            | 0.833                                  | 1.086   | 1.335 |
| tg <sup>+</sup> g <sup>+</sup> g <sup>+</sup> g <sup>+</sup> t | 0.612                                  | 0.794   | 0.963  | g <sup>+</sup> tg <sup>+</sup> tg <sup>-</sup> g <sup>-</sup>               | 1.029                                  | 1.124   | 1.304 |

| Conformation                                                                | $\Delta G_k$ (kcal mol <sup>-1</sup> ) |         |       | Conformation                                                                                             | $\Delta G_k$ (kcal mol <sup>-1</sup> ) |         |       |
|-----------------------------------------------------------------------------|----------------------------------------|---------|-------|----------------------------------------------------------------------------------------------------------|----------------------------------------|---------|-------|
|                                                                             | Gas                                    | Benzene | DMSO  |                                                                                                          | Gas                                    | Benzene | DMSO  |
| g <sup>+</sup> tg <sup>+</sup> g <sup>+</sup> tt                            | 0.625                                  | 0.942   | 1.300 | g <sup>+</sup> g <sup>+</sup> g <sup>+</sup> tg <sup>-</sup> g <sup>-</sup>                              | 0.619                                  | 0.744   | 0.940 |
| g <sup>+</sup> tg <sup>+</sup> g <sup>+</sup> tg <sup>+</sup>               | 1.212                                  | 1.407   | 1.670 | g <sup>+</sup> g <sup>+</sup> g <sup>+</sup> g <sup>+</sup> tt                                           | 1.030                                  | 1.186   | 1.303 |
| g <sup>+</sup> tg <sup>+</sup> g <sup>+</sup> g <sup>+</sup> t              | 0.917                                  | 1.335   | 1.818 | g <sup>+</sup> g <sup>+</sup> g <sup>+</sup> g <sup>+</sup> tg <sup>+</sup>                              | 1.139                                  | 1.245   | 1.425 |
| g <sup>+</sup> tg <sup>+</sup> g <sup>+</sup> g <sup>+</sup> g <sup>+</sup> | 0.519                                  | 0.861   | 1.223 | g <sup>+</sup> g <sup>+</sup> g <sup>+</sup> g <sup>+</sup> tg <sup>-</sup>                              | 1.075                                  | 1.227   | 1.345 |
| g <sup>+</sup> tg <sup>+</sup> g <sup>+</sup> g <sup>-</sup> g <sup>+</sup> | 1.778                                  | 2.645   | 3.489 | g <sup>+</sup> g <sup>+</sup> g <sup>+</sup> g <sup>+</sup> g <sup>+</sup> t                             | 1.228                                  | 1.484   | 1.727 |
| g <sup>+</sup> tg <sup>+</sup> g <sup>+</sup> g <sup>-</sup> g <sup>-</sup> | 2.178                                  | 2.802   | 3.475 | g <sup>+</sup> g <sup>+</sup> g <sup>+</sup> g <sup>+</sup> g <sup>+</sup> g <sup>+</sup>                | 0.943                                  | 1.171   | 1.420 |
| g <sup>+</sup> tg <sup>+</sup> g <sup>-</sup> tt                            | 2.086                                  | 2.448   | 2.813 | g <sup>+</sup> g <sup>+</sup> g <sup>+</sup> g <sup>+</sup> g <sup>-</sup> t                             | 1.229                                  | 1.725   | 2.346 |
| g <sup>+</sup> tg <sup>+</sup> g <sup>-</sup> g <sup>+</sup> g <sup>+</sup> | 4.187                                  | 4.898   | 5.591 | g <sup>+</sup> g <sup>+</sup> g <sup>+</sup> g <sup>+</sup> g <sup>-</sup> g <sup>-</sup>                | 1.512                                  | 1.759   | 2.073 |
| g <sup>+</sup> tg <sup>+</sup> g <sup>-</sup> g <sup>-</sup> t              | 1.582                                  | 2.115   | 2.702 | g <sup>+</sup> g <sup>+</sup> g <sup>+</sup> g <sup>+</sup> g <sup>-</sup> g <sup>-</sup>                | 2.020                                  | 2.303   | 2.622 |
| g <sup>+</sup> tg <sup>+</sup> g <sup>-</sup> g <sup>-</sup> g <sup>-</sup> | 2.147                                  | 2.834   | 3.647 | g <sup>+</sup> g <sup>+</sup> g <sup>+</sup> g <sup>+</sup> g <sup>-</sup> g <sup>-</sup>                | 2.770                                  | 2.973   | 3.297 |
| g <sup>+</sup> tg <sup>-</sup> ttt                                          | 0.831                                  | 0.973   | 1.176 | g <sup>+</sup> g <sup>+</sup> g <sup>+</sup> g <sup>+</sup> g <sup>+</sup> t                             | 2.951                                  | 3.430   | 4.030 |
| g <sup>+</sup> tg <sup>-</sup> ttg <sup>+</sup>                             | 1.244                                  | 1.297   | 1.458 | g <sup>+</sup> g <sup>+</sup> g <sup>+</sup> g <sup>+</sup> g <sup>+</sup> g <sup>+</sup>                | 3.925                                  | 4.326   | 4.847 |
| g <sup>+</sup> tg <sup>-</sup> tg <sup>+</sup> t                            | 0.881                                  | 1.123   | 1.441 | g <sup>+</sup> g <sup>+</sup> g <sup>+</sup> g <sup>+</sup> g <sup>-</sup> t                             | 2.669                                  | 2.988   | 3.351 |
| g <sup>+</sup> tg <sup>-</sup> tg <sup>+</sup> g <sup>+</sup>               | 1.256                                  | 1.332   | 1.447 | g <sup>+</sup> g <sup>+</sup> g <sup>+</sup> g <sup>+</sup> g <sup>-</sup> g <sup>-</sup>                | 2.880                                  | 3.210   | 3.556 |
| g <sup>+</sup> tg <sup>-</sup> tg <sup>-</sup> t                            | 1.009                                  | 1.277   | 1.628 | g <sup>+</sup> g <sup>+</sup> g <sup>+</sup> g <sup>-</sup> ttt                                          | 1.103                                  | 1.390   | 1.716 |
| g <sup>+</sup> tg <sup>-</sup> tg <sup>-</sup> g <sup>-</sup>               | 1.149                                  | 1.238   | 1.400 | g <sup>+</sup> g <sup>+</sup> g <sup>+</sup> g <sup>-</sup> tg <sup>+</sup> t                            | 1.093                                  | 1.404   | 1.732 |
| g <sup>+</sup> tg <sup>-</sup> g <sup>+</sup> tt                            | 2.815                                  | 2.964   | 3.147 | g <sup>+</sup> g <sup>+</sup> g <sup>+</sup> g <sup>-</sup> tg <sup>+</sup> g <sup>+</sup>               | 1.816                                  | 1.982   | 2.220 |
| g <sup>+</sup> tg <sup>-</sup> g <sup>+</sup> g <sup>+</sup> t              | 2.679                                  | 2.989   | 3.358 | g <sup>+</sup> g <sup>+</sup> g <sup>+</sup> g <sup>-</sup> tg <sup>-</sup> t                            | 0.867                                  | 1.191   | 1.528 |
| g <sup>+</sup> tg <sup>-</sup> g <sup>+</sup> g <sup>+</sup> g <sup>+</sup> | 3.195                                  | 3.549   | 4.027 | g <sup>+</sup> g <sup>+</sup> g <sup>+</sup> g <sup>-</sup> tg <sup>-</sup> g <sup>-</sup>               | 0.873                                  | 1.000   | 1.177 |
| g <sup>+</sup> tg <sup>-</sup> g <sup>+</sup> g <sup>-</sup> t              | 3.509                                  | 3.907   | 4.393 | g <sup>+</sup> g <sup>+</sup> g <sup>+</sup> g <sup>-</sup> g <sup>+</sup> tt                            | 2.931                                  | 3.581   | 4.295 |
| g <sup>+</sup> tg <sup>-</sup> g <sup>-</sup> tt                            | 1.631                                  | 1.782   | 1.941 | g <sup>+</sup> g <sup>+</sup> g <sup>+</sup> g <sup>-</sup> g <sup>+</sup> tg <sup>+</sup>               | 3.201                                  | 3.539   | 3.966 |
| g <sup>+</sup> tg <sup>-</sup> g <sup>-</sup> tg <sup>-</sup>               | 1.848                                  | 1.924   | 2.105 | g <sup>+</sup> g <sup>+</sup> g <sup>+</sup> g <sup>-</sup> g <sup>+</sup> g <sup>+</sup> t              | 3.134                                  | 3.504   | 3.872 |
| g <sup>+</sup> tg <sup>-</sup> g <sup>-</sup> g <sup>+</sup> t              | 1.090                                  | 1.500   | 2.026 | g <sup>+</sup> g <sup>+</sup> g <sup>+</sup> g <sup>-</sup> g <sup>+</sup> g <sup>+</sup> g <sup>+</sup> | 3.472                                  | 4.004   | 4.620 |
| g <sup>+</sup> tg <sup>-</sup> g <sup>-</sup> g <sup>+</sup> g <sup>+</sup> | 1.721                                  | 1.977   | 2.356 | g <sup>+</sup> g <sup>+</sup> g <sup>+</sup> g <sup>-</sup> g <sup>-</sup> tg <sup>+</sup>               | 1.040                                  | 1.666   | 2.413 |
| g <sup>+</sup> tg <sup>-</sup> g <sup>-</sup> g <sup>-</sup> t              | 1.280                                  | 1.515   | 1.756 | g <sup>+</sup> g <sup>+</sup> g <sup>+</sup> g <sup>-</sup> g <sup>-</sup> tg <sup>-</sup>               | 1.411                                  | 1.733   | 2.143 |
| g <sup>+</sup> tg <sup>-</sup> g <sup>-</sup> g <sup>-</sup> g <sup>-</sup> | 1.684                                  | 1.844   | 2.055 | g <sup>+</sup> g <sup>+</sup> g <sup>+</sup> g <sup>-</sup> g <sup>-</sup> g <sup>+</sup> t              | 1.954                                  | 2.923   | 4.001 |
| g <sup>+</sup> g <sup>+</sup> tttt                                          | 0.116                                  | 0.255   | 0.354 | g <sup>+</sup> g <sup>+</sup> g <sup>+</sup> g <sup>-</sup> g <sup>-</sup> g <sup>-</sup> t              | 1.316                                  | 1.637   | 1.976 |
| g <sup>+</sup> g <sup>+</sup> ttg <sup>+</sup> t                            | -0.409                                 | -0.144  | 0.215 | g <sup>+</sup> g <sup>+</sup> g <sup>+</sup> g <sup>-</sup> g <sup>-</sup> g <sup>-</sup> g <sup>-</sup> | 1.145                                  | 1.387   | 1.594 |
| g <sup>+</sup> g <sup>+</sup> ttg <sup>+</sup> g <sup>+</sup>               | 0.569                                  | 0.660   | 0.801 | g <sup>+</sup> g <sup>+</sup> g <sup>-</sup> ttg <sup>+</sup> t                                          | -0.290                                 | -0.038  | 0.273 |
| g <sup>+</sup> g <sup>+</sup> ttg <sup>-</sup> t                            | 0.010                                  | 0.267   | 0.551 | g <sup>+</sup> g <sup>+</sup> g <sup>-</sup> tg <sup>-</sup> g <sup>+</sup> g <sup>-</sup>               | 0.980                                  | 1.241   | 1.583 |
| g <sup>+</sup> g <sup>+</sup> ttg <sup>-</sup> g <sup>-</sup>               | 0.202                                  | 0.280   | 0.387 | g <sup>+</sup> g <sup>+</sup> g <sup>-</sup> tg <sup>-</sup> g <sup>-</sup> g <sup>-</sup>               | 1.132                                  | 1.390   | 1.630 |
| g <sup>+</sup> g <sup>+</sup> tg <sup>+</sup> tt                            | 0.464                                  | 0.615   | 0.780 | g <sup>+</sup> g <sup>+</sup> g <sup>-</sup> g <sup>+</sup> tg <sup>+</sup> g <sup>-</sup>               | 0.720                                  | 1.210   | 1.774 |
| g <sup>+</sup> g <sup>+</sup> tg <sup>+</sup> g <sup>+</sup> t              | 0.677                                  | 0.910   | 1.157 | g <sup>+</sup> g <sup>+</sup> g <sup>-</sup> g <sup>-</sup> ttt                                          | 0.436                                  | 0.734   | 1.048 |
| g <sup>+</sup> g <sup>+</sup> tg <sup>+</sup> g <sup>+</sup> g <sup>+</sup> | 0.577                                  | 1.110   | 1.659 | g <sup>+</sup> g <sup>+</sup> g <sup>-</sup> g <sup>-</sup> ttg <sup>-</sup>                             | 1.039                                  | 1.217   | 1.362 |
| g <sup>+</sup> g <sup>+</sup> tg <sup>+</sup> g <sup>-</sup> t              | 0.685                                  | 0.999   | 1.377 | g <sup>+</sup> g <sup>+</sup> g <sup>-</sup> g <sup>-</sup> tg <sup>+</sup> t                            | 0.208                                  | 0.683   | 1.276 |
| g <sup>+</sup> g <sup>+</sup> tg <sup>+</sup> g <sup>-</sup> g <sup>-</sup> | 1.326                                  | 2.235   | 3.209 | g <sup>+</sup> g <sup>+</sup> g <sup>-</sup> g <sup>-</sup> tg <sup>+</sup> g <sup>+</sup>               | 0.753                                  | 1.052   | 1.464 |
| g <sup>+</sup> g <sup>+</sup> tg <sup>-</sup> tt                            | 0.708                                  | 0.857   | 0.994 | g <sup>+</sup> g <sup>+</sup> g <sup>-</sup> g <sup>-</sup> tg <sup>-</sup> g <sup>+</sup>               | 1.662                                  | 2.028   | 2.226 |
| g <sup>+</sup> g <sup>+</sup> tg <sup>-</sup> g <sup>+</sup> t              | 1.224                                  | 1.470   | 1.680 | g <sup>+</sup> g <sup>+</sup> g <sup>-</sup> g <sup>-</sup> tg <sup>-</sup> g <sup>-</sup>               | 0.264                                  | 1.068   | 1.903 |
| g <sup>+</sup> g <sup>+</sup> tg <sup>-</sup> g <sup>+</sup> g <sup>+</sup> | 1.446                                  | 1.690   | 2.055 | g <sup>+</sup> g <sup>+</sup> g <sup>-</sup> g <sup>-</sup> g <sup>+</sup> tt                            | 2.962                                  | 3.363   | 3.778 |
| g <sup>+</sup> g <sup>+</sup> tg <sup>-</sup> g <sup>-</sup> t              | 0.811                                  | 1.067   | 1.341 | g <sup>+</sup> g <sup>+</sup> g <sup>-</sup> g <sup>-</sup> g <sup>+</sup> tg <sup>-</sup>               | 3.028                                  | 3.278   | 3.649 |
| g <sup>+</sup> g <sup>+</sup> tg <sup>-</sup> g <sup>-</sup> g <sup>-</sup> | 0.190                                  | 0.485   | 0.901 | g <sup>+</sup> g <sup>+</sup> g <sup>-</sup> g <sup>-</sup> g <sup>+</sup> g <sup>+</sup> t              | 2.858                                  | 3.695   | 4.642 |
| g <sup>+</sup> g <sup>+</sup> g <sup>+</sup> ttt                            | 0.417                                  | 0.598   | 0.843 | g <sup>+</sup> g <sup>+</sup> g <sup>-</sup> g <sup>-</sup> g <sup>-</sup> tg <sup>+</sup>               | 1.418                                  | 1.592   | 1.789 |
| g <sup>+</sup> g <sup>+</sup> g <sup>+</sup> tg <sup>+</sup> t              | -0.153                                 | 0.050   | 0.163 | g <sup>+</sup> g <sup>+</sup> g <sup>-</sup> g <sup>-</sup> g <sup>-</sup> g <sup>+</sup> t              | 1.531                                  | 2.095   | 2.602 |
| g <sup>+</sup> g <sup>+</sup> g <sup>+</sup> tg <sup>+</sup> g <sup>+</sup> | 0.826                                  | 0.938   | 1.106 | g <sup>+</sup> g <sup>+</sup> g <sup>-</sup> g <sup>-</sup> g <sup>-</sup> g <sup>+</sup> g <sup>+</sup> | 1.172                                  | 1.493   | 1.847 |
| g <sup>+</sup> g <sup>+</sup> g <sup>+</sup> tg <sup>-</sup> t              | 0.119                                  | 0.412   | 0.769 | g <sup>+</sup> g <sup>+</sup> g <sup>-</sup> g <sup>-</sup> g <sup>-</sup> g <sup>-</sup> t              | 1.204                                  | 1.561   | 1.941 |
|                                                                             |                                        |         |       | g <sup>+</sup> g <sup>+</sup> g <sup>-</sup> g <sup>-</sup> g <sup>-</sup> g <sup>-</sup> g <sup>-</sup> | 1.248                                  | 1.671   | 2.204 |

<sup>a</sup>Under the rotational isomeric state approximation, 729 (=3<sup>6</sup>) conformers are conceivable for MAH, and the molecular symmetry decreases the number of irreducible conformers to 365. As a result of the geometrical optimization at the B3LYP/6-311++G(2d,p) level for all the 365 conformers, 181 remained. From left to right, the conformations of bonds 3–6 are written.

**Table S2** Geometrical parameters of PCL, used in the RIS calculations <sup>a</sup>

| Conformation   |                |                |                                   |                                        |                       | Bond d         |                |                |       |       |        |
|----------------|----------------|----------------|-----------------------------------|----------------------------------------|-----------------------|----------------|----------------|----------------|-------|-------|--------|
| <i>j</i> - 1   | <i>j</i>       | <i>j</i> + 1   | <i>l<sub>j</sub></i> <sup>b</sup> | $\angle j \wedge (j + 1)$ <sup>c</sup> | $\phi_j$ <sup>d</sup> | t              | t              | t              | 1.531 | 112.8 | 0.0    |
| <b>Bond a</b>  |                |                |                                   |                                        |                       | t              | t              | t              | 1.535 | 114.5 | 112.2  |
| t              | t              | t              | 1.350                             | 116.2                                  | 0.0                   | t              | g <sup>+</sup> | t              | 1.535 | 114.5 | -112.2 |
| g <sup>+</sup> | t              | t              | 1.352                             | 115.7                                  | 0.6                   | t              | g <sup>-</sup> | t              | 1.531 | 112.7 | 0.7    |
| g <sup>-</sup> | t              | t              | 1.352                             | 115.7                                  | -0.6                  | g <sup>+</sup> | t              | t              | 1.535 | 114.4 | 113.3  |
| t              | t              | g <sup>+</sup> | 1.351                             | 117.0                                  | 0.2                   | g <sup>+</sup> | g <sup>+</sup> | t              | 1.536 | 115.6 | -109.8 |
| g <sup>+</sup> | t              | g <sup>+</sup> | 1.351                             | 117.0                                  | 0.2                   | g <sup>-</sup> | t              | t              | 1.531 | 112.7 | -0.7   |
| g <sup>-</sup> | t              | g <sup>+</sup> | 1.351                             | 117.0                                  | 0.2                   | g <sup>-</sup> | g <sup>+</sup> | t              | 1.536 | 115.6 | 109.8  |
| t              | t              | g <sup>-</sup> | 1.351                             | 117.0                                  | -0.2                  | g <sup>-</sup> | g <sup>-</sup> | t              | 1.535 | 114.4 | -113.3 |
| g <sup>+</sup> | t              | g <sup>-</sup> | 1.351                             | 117.0                                  | -0.2                  | t              | t              | g <sup>+</sup> | 1.533 | 114.5 | 3.7    |
| g <sup>-</sup> | t              | g <sup>-</sup> | 1.351                             | 117.0                                  | -0.2                  | t              | g <sup>+</sup> | g <sup>+</sup> | 1.536 | 116.4 | 114.9  |
| <b>Bond b</b>  |                |                |                                   |                                        |                       | t              | g <sup>-</sup> | g <sup>+</sup> | 1.537 | 116.5 | -114.5 |
| t              | t              | t              | 1.447                             | 107.9                                  | 0.0                   | g <sup>+</sup> | t              | g <sup>+</sup> | 1.532 | 114.6 | 4.2    |
| t              | g <sup>+</sup> | t              | 1.448                             | 111.5                                  | 91.3                  | g <sup>+</sup> | g <sup>+</sup> | g <sup>+</sup> | 1.537 | 116.2 | 117.8  |
| t              | g <sup>-</sup> | t              | 1.448                             | 111.5                                  | -91.3                 | g <sup>+</sup> | g <sup>-</sup> | g <sup>+</sup> | 1.562 | 117.8 | -106.8 |
| t              | t              | g <sup>+</sup> | 1.449                             | 108.3                                  | 0.3                   | g <sup>-</sup> | t              | g <sup>+</sup> | 1.533 | 114.5 | 2.7    |
| t              | g <sup>+</sup> | g <sup>+</sup> | 1.450                             | 112.0                                  | 89.8                  | g <sup>-</sup> | g <sup>+</sup> | g <sup>+</sup> | 1.538 | 117.1 | 119.9  |
| t              | g <sup>-</sup> | g <sup>+</sup> | 0.000                             | 0.0                                    | 0.0                   | g <sup>-</sup> | g <sup>-</sup> | g <sup>+</sup> | 1.537 | 116.2 | -117.5 |
| t              | t              | g <sup>-</sup> | 1.449                             | 108.3                                  | -0.3                  | t              | t              | g <sup>-</sup> | 1.533 | 114.5 | -3.7   |
| t              | g <sup>+</sup> | g <sup>+</sup> | 0.000                             | 0.0                                    | 0.0                   | t              | g <sup>+</sup> | g <sup>-</sup> | 1.537 | 116.5 | 114.5  |
| t              | g <sup>-</sup> | g <sup>-</sup> | 1.450                             | 112.0                                  | -89.8                 | t              | g <sup>-</sup> | g <sup>-</sup> | 1.536 | 116.4 | -114.9 |
| <b>Bond c</b>  |                |                |                                   |                                        |                       | g <sup>+</sup> | t              | g <sup>-</sup> | 1.533 | 114.5 | -2.7   |
| t              | t              | t              | 1.517                             | 112.0                                  | 0.0                   | g <sup>+</sup> | g <sup>+</sup> | g <sup>-</sup> | 1.537 | 116.2 | 117.5  |
| t              | g <sup>+</sup> | t              | 1.517                             | 114.2                                  | 114.6                 | g <sup>+</sup> | g <sup>-</sup> | g <sup>-</sup> | 1.538 | 117.1 | -119.9 |
| t              | g <sup>-</sup> | t              | 1.517                             | 114.2                                  | -114.6                | g <sup>-</sup> | t              | g <sup>-</sup> | 1.532 | 114.6 | -4.2   |
| g <sup>+</sup> | t              | t              | 1.521                             | 111.9                                  | 3.4                   | g <sup>-</sup> | g <sup>+</sup> | g <sup>-</sup> | 1.562 | 117.8 | 106.8  |
| g <sup>+</sup> | g <sup>+</sup> | t              | 1.521                             | 114.1                                  | 118.1                 | g <sup>-</sup> | g <sup>-</sup> | g <sup>-</sup> | 1.537 | 116.2 | -117.8 |
| g <sup>+</sup> | g <sup>-</sup> | t              | 1.521                             | 114.2                                  | -111.9                | <b>Bond e</b>  |                |                |       |       |        |
| g <sup>-</sup> | t              | t              | 1.521                             | 111.9                                  | -3.4                  | t              | t              | t              | 1.530 | 112.5 | 0.0    |
| g <sup>-</sup> | g <sup>+</sup> | t              | 1.521                             | 114.2                                  | 111.9                 | t              | g <sup>+</sup> | t              | 1.534 | 113.8 | 113.7  |
| g <sup>-</sup> | g <sup>-</sup> | t              | 1.521                             | 114.1                                  | -118.1                | t              | g <sup>-</sup> | t              | 1.534 | 113.8 | -113.7 |
| t              | t              | g <sup>+</sup> | 1.518                             | 113.3                                  | 3.2                   | g <sup>+</sup> | t              | t              | 1.532 | 112.2 | 3.1    |
| t              | g <sup>+</sup> | g <sup>+</sup> | 1.518                             | 115.4                                  | 117.0                 | g <sup>+</sup> | g <sup>+</sup> | t              | 1.536 | 113.7 | 116.1  |
| t              | g <sup>-</sup> | g <sup>+</sup> | 1.519                             | 116.3                                  | -105.5                | g <sup>+</sup> | g <sup>-</sup> | t              | 1.541 | 114.6 | -90.3  |
| g <sup>+</sup> | t              | g <sup>+</sup> | 1.523                             | 113.4                                  | 9.1                   | g <sup>-</sup> | t              | t              | 1.532 | 112.2 | -3.1   |
| g <sup>+</sup> | g <sup>+</sup> | g <sup>+</sup> | 1.523                             | 115.3                                  | 120.6                 | g <sup>-</sup> | g <sup>+</sup> | t              | 1.541 | 114.6 | 90.3   |
| g <sup>+</sup> | g <sup>-</sup> | g <sup>+</sup> | 1.519                             | 114.0                                  | -115.7                | g <sup>-</sup> | g <sup>-</sup> | t              | 1.536 | 113.7 | -116.1 |
| g <sup>+</sup> | t              | g <sup>+</sup> | 1.523                             | 113.3                                  | 0.9                   | t              | t              | g <sup>+</sup> | 1.531 | 113.6 | -0.1   |
| g <sup>+</sup> | g <sup>+</sup> | g <sup>+</sup> | 1.523                             | 115.5                                  | 111.1                 | t              | g <sup>+</sup> | g <sup>+</sup> | 1.535 | 115.1 | 113.4  |
| g <sup>+</sup> | g <sup>-</sup> | g <sup>+</sup> | 1.523                             | 116.2                                  | -111.9                | t              | g <sup>-</sup> | g <sup>+</sup> | 1.535 | 114.9 | -116.5 |
| g <sup>+</sup> | g <sup>-</sup> | g <sup>+</sup> | 1.524                             | 116.2                                  | -111.9                | g <sup>+</sup> | t              | g <sup>+</sup> | 1.533 | 113.4 | 4.7    |
| t              | t              | g <sup>-</sup> | 1.518                             | 113.3                                  | -3.2                  | g <sup>+</sup> | g <sup>+</sup> | g <sup>+</sup> | 1.537 | 114.9 | 117.0  |
| t              | g <sup>+</sup> | g <sup>-</sup> | 1.519                             | 116.3                                  | 105.5                 | g <sup>+</sup> | g <sup>-</sup> | g <sup>+</sup> | 1.539 | 117.0 | -109.8 |
| t              | g <sup>-</sup> | g <sup>-</sup> | 1.518                             | 115.4                                  | -117                  | g <sup>-</sup> | t              | g <sup>+</sup> | 1.533 | 113.2 | -4.4   |
| g <sup>+</sup> | t              | g <sup>-</sup> | 1.523                             | 113.3                                  | -0.9                  | g <sup>-</sup> | g <sup>+</sup> | g <sup>+</sup> | 1.537 | 116.2 | 118.3  |
| g <sup>+</sup> | g <sup>+</sup> | g <sup>-</sup> | 1.524                             | 116.2                                  | 111.9                 | g <sup>-</sup> | g <sup>-</sup> | g <sup>+</sup> | 1.537 | 114.9 | -114   |
| g <sup>+</sup> | g <sup>-</sup> | g <sup>-</sup> | 1.523                             | 115.5                                  | -111.1                | t              | t              | g <sup>-</sup> | 1.531 | 113.6 | 0.1    |
| g <sup>+</sup> | t              | g <sup>-</sup> | 1.523                             | 113.4                                  | -9.1                  | t              | g <sup>+</sup> | g <sup>-</sup> | 1.535 | 114.9 | 116.5  |
| g <sup>+</sup> | g <sup>+</sup> | g <sup>-</sup> | 1.519                             | 114.0                                  | 115.7                 | t              | g <sup>-</sup> | g <sup>-</sup> | 1.535 | 115.1 | -113.4 |
| g <sup>+</sup> | g <sup>-</sup> | g <sup>-</sup> | 1.523                             | 115.3                                  | -120.6                | g <sup>+</sup> | t              | g <sup>-</sup> | 1.533 | 113.2 | 4.4    |
|                |                |                |                                   |                                        |                       | g <sup>+</sup> | g <sup>+</sup> | g <sup>-</sup> | 1.537 | 114.9 | 114.0  |
|                |                |                |                                   |                                        |                       | g <sup>+</sup> | g <sup>-</sup> | g <sup>-</sup> | 1.537 | 116.2 | -118.3 |
|                |                |                |                                   |                                        |                       | g <sup>-</sup> | t              | g <sup>-</sup> | 1.533 | 113.4 | -4.7   |
|                |                |                |                                   |                                        |                       | g <sup>-</sup> | g <sup>+</sup> | g <sup>-</sup> | 1.539 | 117.0 | 109.8  |
|                |                |                |                                   |                                        |                       | g <sup>-</sup> | g <sup>-</sup> | g <sup>-</sup> | 1.537 | 114.9 | -117   |

| Bond f         |                |                |       |       |        |
|----------------|----------------|----------------|-------|-------|--------|
| t              | t              | t              | 1.526 | 113.6 | 0.0    |
| t              | g <sup>+</sup> | t              | 1.529 | 113.7 | 108.7  |
| t              | g <sup>-</sup> | t              | 1.529 | 113.7 | -108.7 |
| g <sup>+</sup> | t              | t              | 1.528 | 113.3 | 3.8    |
| g <sup>+</sup> | g <sup>+</sup> | t              | 1.531 | 113.7 | 111.2  |
| g <sup>+</sup> | g <sup>-</sup> | t              | 1.534 | 114.3 | -95.8  |
| g <sup>-</sup> | t              | t              | 1.528 | 113.3 | -3.8   |
| g <sup>-</sup> | g <sup>+</sup> | t              | 1.534 | 114.3 | 95.8   |
| g <sup>-</sup> | g <sup>-</sup> | t              | 1.531 | 113.7 | -111.2 |
| t              | t              | g <sup>+</sup> | 1.540 | 111.3 | 2.9    |
| t              | g <sup>+</sup> | g <sup>+</sup> | 1.537 | 114.2 | 117.2  |
| t              | g <sup>-</sup> | g <sup>+</sup> | 1.544 | 112.5 | -100.3 |
| g <sup>+</sup> | t              | g <sup>+</sup> | 1.540 | 112.0 | 6.8    |
| g <sup>+</sup> | g <sup>+</sup> | g <sup>+</sup> | 1.542 | 113.0 | 121.0  |
| g <sup>+</sup> | g <sup>-</sup> | g <sup>+</sup> | 1.532 | 113.8 | -112.3 |
| g <sup>-</sup> | t              | g <sup>+</sup> | 1.541 | 111.8 | 0.8    |
| g <sup>-</sup> | g <sup>+</sup> | g <sup>+</sup> | 1.539 | 116.6 | 105.6  |
| g <sup>-</sup> | g <sup>-</sup> | g <sup>+</sup> | 1.532 | 113.8 | -112.3 |
| t              | t              | g <sup>-</sup> | 1.540 | 111.3 | -2.9   |
| t              | g <sup>+</sup> | g <sup>-</sup> | 1.544 | 112.5 | 100.3  |
| t              | g <sup>-</sup> | g <sup>-</sup> | 1.537 | 114.2 | -117.2 |
| g <sup>+</sup> | t              | g <sup>-</sup> | 1.541 | 111.8 | -0.8   |
| g <sup>+</sup> | g <sup>+</sup> | g <sup>-</sup> | 1.532 | 113.8 | 112.3  |
| g <sup>+</sup> | g <sup>-</sup> | g <sup>-</sup> | 1.539 | 116.6 | -105.6 |
| g <sup>-</sup> | t              | g <sup>-</sup> | 1.540 | 112.0 | -6.8   |
| g <sup>-</sup> | g <sup>+</sup> | g <sup>-</sup> | 1.532 | 113.8 | 112.3  |
| g <sup>-</sup> | g <sup>-</sup> | g <sup>-</sup> | 1.542 | 113.0 | -121   |
| Bond g         |                |                |       |       |        |
| t              | t              | t              | 1.512 | 110.9 | 0.0    |
| t              | g <sup>+</sup> | t              | 1.511 | 111.6 | 121.1  |
| t              | g <sup>-</sup> | t              | 1.511 | 111.6 | -121.1 |
| g <sup>+</sup> | t              | t              | 1.514 | 111.1 | -19.2  |
| g <sup>+</sup> | g <sup>+</sup> | t              | 1.513 | 111.5 | 121.4  |
| g <sup>+</sup> | g <sup>-</sup> | t              | 1.512 | 112.2 | -93.7  |
| g <sup>-</sup> | t              | t              | 1.514 | 111.1 | 19.2   |
| g <sup>-</sup> | g <sup>+</sup> | t              | 1.512 | 112.2 | 93.7   |
| g <sup>-</sup> | g <sup>-</sup> | t              | 1.513 | 111.5 | -121.4 |

<sup>a</sup>Optimized at the B3LYP/6-311++G(2d,p) level. *j* denotes the current bond. <sup>b</sup>Length of bond *j*. <sup>c</sup>Angle formed between bonds *j* and *j* + 1. <sup>d</sup>Dihedral angle of bond *j*, defined according to the convention in polymer science: t,  $\phi_j \approx 0^\circ$ ; g<sup>±</sup>,  $\phi_j \approx \pm 120^\circ$ .

**Table S3** Optimized and experimental crystal structures of PES<sup>a</sup>

|   | Optimized <sup>b</sup>                     |            |            | Experimental <sup>c</sup> |            |            |
|---|--------------------------------------------|------------|------------|---------------------------|------------|------------|
|   | Lattice Constant (Å)                       |            |            |                           |            |            |
|   | <i>a</i>                                   | <i>b</i>   | <i>c</i>   | <i>a</i>                  | <i>b</i>   | <i>c</i>   |
|   | 7.42                                       | 10.08      | 8.48       | 7.60                      | 10.75      | 8.33       |
|   | $\Delta_{\text{LC}} = 2.3\%$ <sup>d</sup>  |            |            |                           |            |            |
|   | Fractional Coordinates                     |            |            |                           |            |            |
|   | <i>x/a</i>                                 | <i>y/b</i> | <i>z/c</i> | <i>x/a</i>                | <i>y/b</i> | <i>z/c</i> |
| C | 0.721                                      | -0.027     | 0.664      | 0.719                     | -0.013     | 0.663      |
| C | 0.806                                      | 0.083      | 0.569      | 0.787                     | 0.094      | 0.571      |
| C | 0.799                                      | 0.201      | 0.328      | 0.798                     | 0.198      | 0.331      |
| O | 0.731                                      | 0.094      | 0.425      | 0.724                     | 0.099      | 0.422      |
| O | 0.929                                      | 0.153      | 0.614      | 0.903                     | 0.161      | 0.615      |
| H | 0.760                                      | -0.122     | 0.609      | 0.760                     | -0.097     | 0.600      |
| H | 0.575                                      | -0.021     | 0.651      | 0.575                     | -0.013     | 0.665      |
| H | 0.944                                      | 0.191      | 0.311      | 0.939                     | 0.190      | 0.316      |
| H | 0.772                                      | 0.295      | 0.386      | 0.765                     | 0.282      | 0.396      |
|   | $\Delta_{\text{CHO}} = 0.016$ <sup>e</sup> |            |            |                           |            |            |

<sup>a</sup>Orthorhombic, space group *Pbnb*. <sup>b</sup>At 0 K. <sup>c</sup>Ueda, A. S.; Chatani, Y.; Tadokoro, H. *Polym. J.* **1971**, *2*, 387–397. At room temperature.

$${}^d \Delta_{\text{LC}} = \frac{1}{3} \left[ \left( \frac{a_{\text{calc}} - a_{\text{expt}}}{a_{\text{expt}}} \right)^2 + \left( \frac{b_{\text{calc}} - b_{\text{expt}}}{b_{\text{expt}}} \right)^2 + \left( \frac{c_{\text{calc}} - c_{\text{expt}}}{c_{\text{expt}}} \right)^2 \right]^{1/2} \times 100 (\%)$$

$${}^e \Delta_{\text{CHO}} = \frac{1}{N_{\text{atom}}} \sum_{\text{atom}} \left\{ \left[ \left( \frac{x}{a} \right)_{\text{calc}} - \left( \frac{x}{a} \right)_{\text{expt}} \right]^2 + \left[ \left( \frac{y}{b} \right)_{\text{calc}} - \left( \frac{y}{b} \right)_{\text{expt}} \right]^2 + \left[ \left( \frac{z}{c} \right)_{\text{calc}} - \left( \frac{z}{c} \right)_{\text{expt}} \right]^2 \right\}^{1/2}$$

which was calculated for carbon, oxygen, and hydrogen atoms.

**Table S4** Optimized and experimental crystal structures of  $\alpha$  form of PBS<sup>a</sup>

|   | Optimized <sup>b</sup>              |            |            |         | Experimental <sup>c</sup> |            |            |         |
|---|-------------------------------------|------------|------------|---------|---------------------------|------------|------------|---------|
|   | Lattice Constant (Å, °)             |            |            |         |                           |            |            |         |
|   | <i>a</i>                            | <i>b</i>   | <i>c</i>   | $\beta$ | <i>a</i>                  | <i>b</i>   | <i>c</i>   | $\beta$ |
|   | 5.21                                | 8.71       | 10.88      | 125.7   | 5.23                      | 9.12       | 10.90      | 123.9   |
|   | $\Delta_{LC} = 1.2\%$ <sup>d</sup>  |            |            |         |                           |            |            |         |
|   | Fractional Coordinates              |            |            |         |                           |            |            |         |
|   | <i>x/a</i>                          | <i>y/b</i> | <i>z/c</i> |         | <i>x/a</i>                | <i>y/b</i> | <i>z/c</i> |         |
| C | 0.1351                              | 0.0571     | 0.5489     |         | 0.0839                    | 0.0711     | 0.5389     |         |
| C | 0.0890                              | 0.1524     | 0.6513     |         | -0.0117                   | 0.1387     | 0.6360     |         |
| C | 0.0074                              | 0.0964     | 0.8420     |         | -0.0195                   | 0.0832     | 0.8352     |         |
| C | 0.0634                              | -0.0237    | 0.9551     |         | 0.0690                    | -0.0216    | 0.9564     |         |
| O | 0.1262                              | 0.0508     | 0.7670     |         | 0.0696                    | 0.0351     | 0.7495     |         |
| O | -0.1270                             | 0.2189     | 0.8202     |         | -0.1536                   | 0.1964     | 0.8164     |         |
| H | 0.1556                              | 0.1359     | 0.4765     |         | 0.0392                    | 0.1534     | 0.4566     |         |
| H | 0.3600                              | -0.0048    | 0.6175     |         | 0.3308                    | 0.0504     | 0.6104     |         |
| H | 0.2639                              | 0.2440     | 0.7082     |         | 0.1104                    | 0.2419     | 0.6821     |         |
| H | -0.1473                             | 0.2021     | 0.5889     |         | -0.2591                   | 0.1590     | 0.5696     |         |
| H | 0.3171                              | -0.0467    | 1.0308     |         | 0.3190                    | -0.0237    | 1.0322     |         |
| H | -0.0486                             | -0.1293    | 0.8911     |         | -0.0138                   | -0.1308    | 0.9106     |         |
|   | $\Delta_{CHO} = 0.068$ <sup>e</sup> |            |            |         |                           |            |            |         |

<sup>a</sup>Monoclinic, space group  $P2_1/n$ . <sup>b</sup>At 0 K. <sup>c</sup>Ichikawa, Y.; Kondo, H.; Igarashi, Y.; Noguchi, K.; Okuyama, K.; Washiyama, J. *Polymer* **2000**, *41*, 4719–4727; **2001**, *42*, 847–847.

$${}^d \Delta_{LC} = \frac{1}{4} \left[ \left( \frac{a_{\text{calc}} - a_{\text{expt}}}{a_{\text{expt}}} \right)^2 + \left( \frac{b_{\text{calc}} - b_{\text{expt}}}{b_{\text{expt}}} \right)^2 + \left( \frac{c_{\text{calc}} - c_{\text{expt}}}{c_{\text{expt}}} \right)^2 + \left( \frac{\beta_{\text{calc}} - \beta_{\text{expt}}}{\beta_{\text{expt}}} \right)^2 \right]^{1/2} \times 100 (\%)$$

$${}^e \Delta_{CHO} = \frac{1}{N_{\text{atom}}} \sum_{\text{atom}} \left\{ \left[ \left( \frac{x}{a} \right)_{\text{calc}} - \left( \frac{x}{a} \right)_{\text{expt}} \right]^2 + \left[ \left( \frac{y}{b} \right)_{\text{calc}} - \left( \frac{y}{b} \right)_{\text{expt}} \right]^2 + \left[ \left( \frac{z}{c} \right)_{\text{calc}} - \left( \frac{z}{c} \right)_{\text{expt}} \right]^2 \right\}^{1/2}$$

which was calculated for carbon, oxygen, and hydrogen atoms.



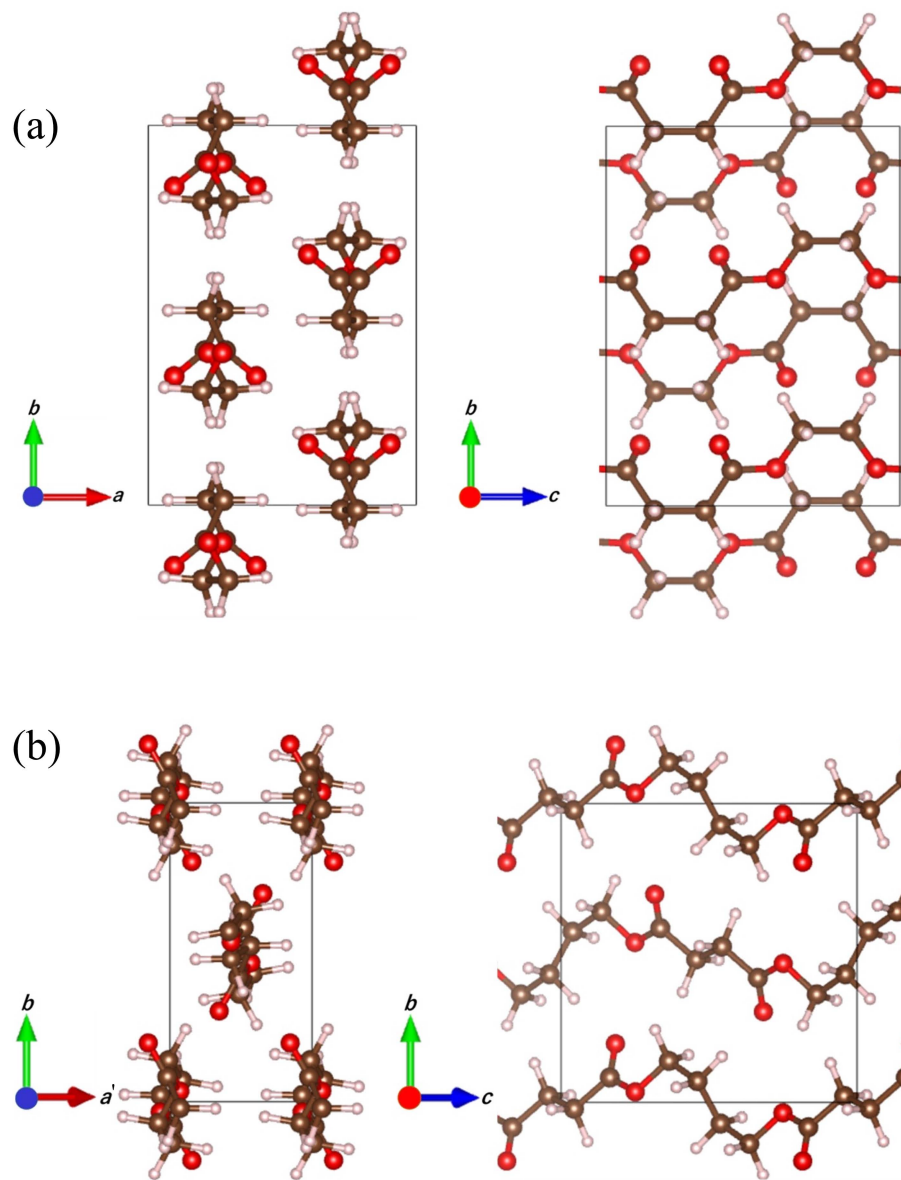

**Fig. S1** Crystal structure optimized by the periodic DFT at the B3LYP-D/6-31G(d,p) level: (a) PES; (b)  $\alpha$ -form of PBS.

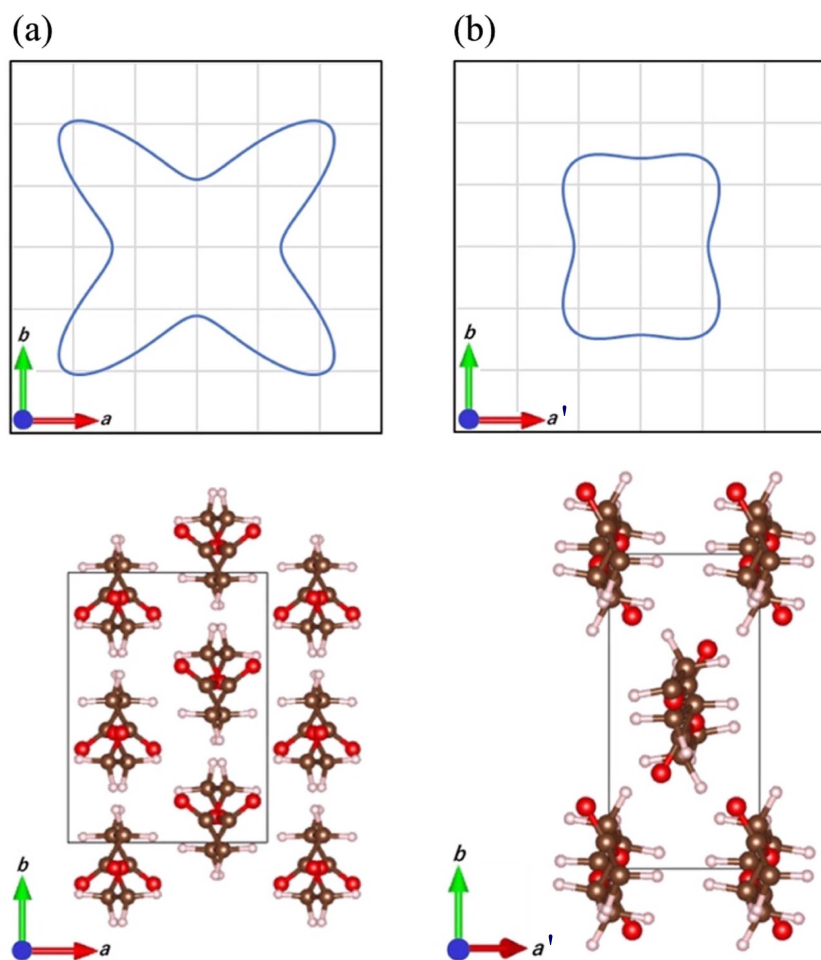

**Fig. S2** Young's modulus distributions on the plane perpendicular to the fiber axis: (a) PES; (b)  $\alpha$ -form of PBS. The grid spacing corresponds to 10 GPa.
